# Supplementary material for: Benthic foraminiferal patchiness – revisited
Source: Copernicus journal article supplement (doi:10.5194/jm-42-171-2023), 2023-11-03
Supplement: Supplementary file 1 [file jm-42-171-2023-supplement.zip]

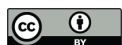

## *Supplement of*

## **Benthic foraminiferal patchiness – revisited**

**Joachim Schönfeld et al.**

*Correspondence to:* Joachim Schönfeld ([jschoenfeld@geomar.de](mailto:jschoenfeld@geomar.de))

- [jm-42-171-2023-supplement-title-page.pdf](#)
- [Schoenfeld\\_al\\_Globobulimina\\_patchiness\\_fauna\\_Supplement\\_1.xls](#)
- [Schoenfeld\\_al\\_Globobulimina\\_patchiness\\_oxygen\\_Supplement\\_2.xls](#)

The copyright of individual parts of the supplement might differ from the article licence.
